# Supplementary material
Source: PubMed Central journal article supplement (PMC6204889)
Supplement: supp_RA118.004862_139402_2_supp_199393_pyt5jx.pdf [file supp_RA118.004862_139402_2_supp_199393_pyt5jx.pdf]

## Supporting Information

### **Development of an allosteric inhibitor class blocking RNA elongation by the respiratory syncytial virus polymerase complex**

Robert M Cox<sup>1</sup>, Mart Toots<sup>1</sup>, Jeong-Joong Yoon<sup>1</sup>, Julien Sourimant<sup>1</sup>, Barbara Ludeke<sup>2</sup>, Rachel Fearn<sup>2</sup>, Elyse Bourque<sup>3</sup>,  
Joseph Patti<sup>4</sup>, Edward Lee<sup>4</sup>, John Vernachio<sup>4</sup>, Richard K Plemper<sup>1,\*</sup>

From the <sup>1</sup>Institute for Biomedical Sciences, Georgia State University, Atlanta, GA, <sup>2</sup>Department of Microbiology, Boston University School of Medicine, Boston, MA, <sup>3</sup>Independent Consultant, Bellingham, WA, <sup>4</sup>Aviragen Therapeutics, Alpharetta, GA

## General Synthesis scheme:

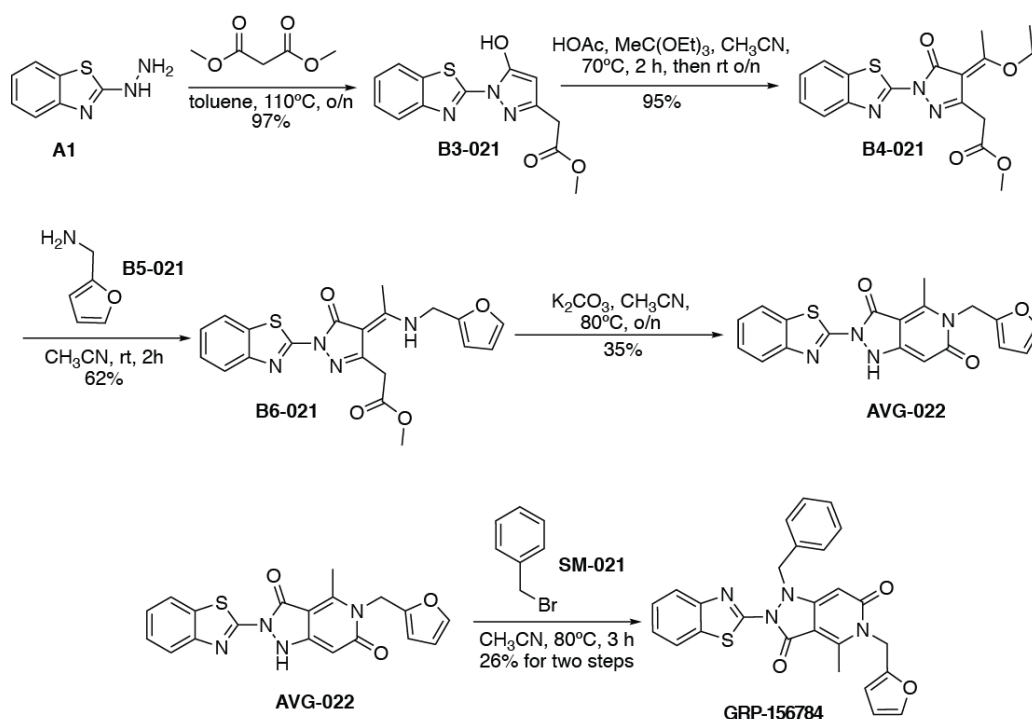

**The synthesis of methyl 2-(1-(benzo[*d*]thiazol-2-yl)-5-hydroxy-1*H*-pyrazol-3-yl)acetate (**B3-021**).** To a solution of A1 (3.3 g, 19.97 mmol) in toluene (30 mL) was added B2 (3.5 g, 19.97 mmol), then the reaction mixture was stirred at 110 °C overnight. After cooling the reaction mixture to room temperature, the resulting solid was filtered, washed with toluene and dried in vacuum to give B3-021 (5.6 g, 97% yield) as a white solid. B3-021 purity was determined by LCMS using an Agilent 1200-6120 system with a Waters X-Bridge C18 (30mm×4.6 mm×3.5 μm) column (40°C; 2.0 mL/min). Mobile Phase: from 90% [water + 10 mM NH<sub>4</sub>HCO<sub>3</sub>] and 10% [CH<sub>3</sub>CN] to 5% [water + 10 mM NH<sub>4</sub>HCO<sub>3</sub>] and 95% [CH<sub>3</sub>CN] in 0.5 min, then under this condition for 1.5 min, finally changed to 90% [water + 10 mM NH<sub>4</sub>HCO<sub>3</sub>] and 10% [CH<sub>3</sub>CN] in 0.1 min and under this condition for 0.5 min. Purity was found to be 97.2%, Rt = 0.874 min; MS Calcd.: 289.1; MS Found: 290.0 [M + H]<sup>+</sup>. For synthesis of analogs with modifications to section 1, hydrazine forms of the substitutions were in place of A1.

**The synthesis of (*E*)-methyl 2-(1-(benzo[*d*]thiazol-2-yl)-4-(1-ethoxyethylidene)-5-oxo-4,5-dihydro-1*H*-pyrazol-3-yl)acetate (**B4-021**).** HOAc (186 mg, 3.10 mmol) was added to a mixture of B3-021 (4.5 g, 15.49 mmol) and MeC(OEt)<sub>3</sub> (7.5 g, 46.46 mmol) in CH<sub>3</sub>CN (50 mL) and the reaction mixture was stirred at 70°C for 2 h. Following this, the reaction mixture was stirred at room temperature overnight. After the reaction was complete, the resulting solid was filtered, then

washed with CH<sub>3</sub>CN and dried in vacuum to give B4-021 (5.3 g, 95% yield) as a white solid. B4-021 purity was determined by LCMS using an Agilent 1200-6120 system with a Waters X-Bridge C18 (50 mm×4.6 mm×3.5 μm) column (40°C; 2.0 mL/min). Mobile Phase: from 95% [water + 0.05% TFA] and 5% [CH<sub>3</sub>CN + 0.05% TFA] to 0% [water + 0.05% TFA] and 100% [CH<sub>3</sub>CN + 0.05 % TFA] in 1.6 min, then under this condition for 1.4 min, finally changed to 95% [water + 0.05% TFA] and 5% [CH<sub>3</sub>CN + 0.05% TFA] in 0.05 min and under this condition for 0.7 min. Purity was found to be 100%. Rt = 1.353 min; MS Calcd.: 359.1; MS Found: 332.1 [M – 28 + H]<sup>+</sup>. B4-021 NMR analysis: <sup>1</sup>H NMR (400 MHz, DMSO-d<sub>6</sub>) δ 8.04 (d, J = 7.6 Hz, 1H), 7.84 (d, J = 7.6 Hz, 1H), 7.48 (ddd, J = 8.4, 8.4, 1.2 Hz, 1H), 7.35 (ddd, J = 8.4, 8.0, 1.2 Hz, 1H), 4.47 (q, J = 7.2 Hz, 2H), 3.83 (s, 2H), 3.67 (s, 3H), 2.84 (s, 3H), 1.33 (t, J = 6.8 Hz, 3H).

**The synthesis of (*E*)-methyl 2-(1-(benzo[*d*]thiazol-2-yl)-4-(1-(furan-2-ylmethylamino)ethylidene)-5-oxo-4,5-dihydro-1*H*-pyrazol-3-yl)acetate (B6-021).** B5-021 (1.6 g, 16.49 mmol) was added to a solution of B4-021 (4.9 g, 13.75 mmol) in CH<sub>3</sub>CN (30 mL), and then the reaction mixture was stirred at room temperature for 2 h. The resulting solid was collected by filtration, washed with CH<sub>3</sub>CN and dried in vacuum to give B6-021 (3.5 g, 62% yield) as a white solid. B3-021 purity was determined by LCMS using an Agilent 1200-6120 system with a Waters X-Bridge C18 (50 mm×4.6 mm×3.5 μm) column (40°C; 2.0 mL/min). Mobile Phase: from 95% [water + 0.05% TFA] and 5% [CH<sub>3</sub>CN + 0.05% TFA] to 0% [water + 0.05% TFA] and 100% [CH<sub>3</sub>CN + 0.05 % TFA] in 1.6 min, then under this condition for 1.4 min, finally changed to 95% [water + 0.05% TFA] and 5% [CH<sub>3</sub>CN + 0.05% TFA] in 0.05 min and under this condition for 0.7 min. Purity was found to be 100%. Rt = 1.741 min; MS Calcd.: 410.1; MS Found: 411.1 [M + H]<sup>+</sup>. For synthesis of analogs possessing modifications to section 3, amine forms of the groups were used similarly to B5-021.

**The synthesis of 2-(benzo[*d*]thiazol-2-yl)-5-(furan-2-ylmethyl)-4-methyl-1*H*-pyrazolo[4,3-*c*]pyridine -3,6(2*H*,5*H*)-dione (AVG-022).** K<sub>2</sub>CO<sub>3</sub> (337 mg, 2.44 mmol) was added to a solution of B6-021 (0.5 g, 1.22 mmol) in CH<sub>3</sub>CN (20 mL), then the reaction mixture was stirred at 80 °C overnight. The mixture was concentrated to dryness and the residue was diluted with water (20 mL). The pH value of this mixture was adjusted to 7 with hydrochloric acid (1 N). The resulting solid was filtered, washed with water and dried in vacuum to give AVG-022 (160 mg, 35% yield) as a brown solid. AVG-022 purity was determined by LCMS using an Agilent 1200-6120 system with a Waters X-Bridge C18 (150mm×4.6 mm×3.5 μm) column (40°C; 1.0 mL/min). Mobile Phase: from 95% [water + 10 mM NH<sub>4</sub>HCO<sub>3</sub>] and 5% [CH<sub>3</sub>CN] to 0% [water + 10 mM NH<sub>4</sub>HCO<sub>3</sub>] and 100% [CH<sub>3</sub>CN] in 10 min, then under this condition for 5 min, finally changed to 95% [water + 10 mM NH<sub>4</sub>HCO<sub>3</sub>] and 5% [CH<sub>3</sub>CN] in 0.1 min and under this condition for 5 min. Purity is 100.0%, Rt = 6.429 min. AVG-022 NMR analysis: <sup>1</sup>H NMR (400 MHz, DMSO-d<sub>6</sub>) δ 11.90 (s, 1H), 8.07 (d, J = 8.0 Hz,

1H), 7.84 (d, J = 8.0 Hz, 1H), 7.61 (s, 1H), 7.50 (dd, J = 7.6, 7.2 Hz, 1H), 7.37 (dd, J = 7.6, 7.6 Hz, 1H), 6.43 (s, 1H), 6.37 (d, J = 2.8 Hz, 1H), 5.73 (s, 1H), 5.34 (s, 2H), 2.96 (s, 3H).

**The synthesis of 2-(benzo[*d*]thiazol-2-yl)-1-benzyl-5-(furan-2-ylmethyl)-4-methyl-1*H*-pyrazolo[4,3-*c*] pyridine-3,6(2*H*,5*H*)-dione (GRP-156784).** K<sub>2</sub>CO<sub>3</sub> (138 mg, 1.00 mmol) was added to a solution of B6-021 (205 mg, 0.50 mmol) in CH<sub>3</sub>CN (10 mL), then the reaction mixture was stirred at 80°C overnight. After being cooled to room temperature, SM-021 (85 mg, 0.50 mmol) was subsequently added, and then the mixture was stirred at 80°C for 3 h. After being cooled to room temperature, the reaction system was diluted with water (20 mL) and extracted with ethyl acetate (20 mL×3). The combined organic layers were washed with brine (20 mL×2), dried over sodium sulfate, and concentrated to dryness. The residue was purified by Prep-TLC (petrol ether/EtOAc = 1/1) to give GRP-156784 (60 mg, 26% yield) as a white solid. GRP-156784 purity was determined by LCMS using an Agilent 1200-6120 system with a Waters X-Bridge C18 (150mm×4.6 mm×3.5 μm) column (40°C; 1.0 mL/min). Mobile Phase: from 95% [water + 10 mM NH<sub>4</sub>HCO<sub>3</sub>] and 5% [CH<sub>3</sub>CN] to 0% [water + 10 mM NH<sub>4</sub>HCO<sub>3</sub>] and 100% [CH<sub>3</sub>CN] in 10 min, then under this condition for 5 min, finally changed to 95% [water + 10 mM NH<sub>4</sub>HCO<sub>3</sub>] and 5% [CH<sub>3</sub>CN] in 0.1 min and under this condition for 5 min. Purity is 100.0%, Rt = 10.392 min. GRP-156784 NMR analysis: <sup>1</sup>H NMR (400 MHz, DMSO-*d*<sub>6</sub>) δ 8.09 (d, J = 7.6 Hz, 1H), 7.97 (d, J = 8.0 Hz, 1H), 7.61 (dd, J = 1.8, 1.0 Hz, 1H), 7.54 (ddd, J = 8.0, 7.2, 1.2 Hz, 1H), 7.41 (ddd, J = 8.4, 8.0, 1.2 Hz, 1H), 7.24-7.19 (m, 3H), 7.04-7.01 (m, 2H), 6.48 (s, 1H), 6.43 (dd, J = 3.2, 2.0 Hz, 1H), 6.36 (d, J = 2.4 Hz, 1H), 5.54 (s, 2H), 5.32 (s, 2H), 2.89 (s, 3H). For synthesis of analogs possessing modifications to section 2, bromomethyl- forms of the substitutions were used in place of B6-021.

**Table S1.** Chemical elaboration of scaffolds section 1.

| 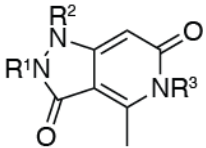   |                                                                                     |                                                                                     |         |                       |                       |      |                                                                                      |                      |  |
|-------------------------------------------------------------------------------------|-------------------------------------------------------------------------------------|-------------------------------------------------------------------------------------|---------|-----------------------|-----------------------|------|--------------------------------------------------------------------------------------|----------------------|--|
| R <sup>1</sup>                                                                      | R <sup>2</sup>                                                                      | R <sup>3</sup>                                                                      | Name    | EC <sub>50</sub> [μM] | CC <sub>50</sub> [μM] | SI   | SMILES                                                                               | 3D-QSAR <sup>1</sup> |  |
|    |    |    | AVG-033 | 2.8 (2.01 - 4.5)      | 169.0                 | 60   | <chem>CC(N1CC2=CC=CO2)=C3C(N(CC4=CC=CC=C4)N(C5=NC(C)=C(C)S5)C3=O)=CC1=O</chem>       | TE                   |  |
|    |    |    | AVG-034 | 1.5 (1.1 - 2.2)       | 300.0                 | 200  | <chem>CC(N1CC2=CC=CO2)=C3C(N(CC4=CC=CC=C4)N(C5=CC(C=CC=C6)=C6C=N5)C3=O)=CC1=O</chem> | N/A                  |  |
|    |    |    | AVG-035 | 1.49 (0.94 - 2.1)     | >300                  | >201 | <chem>CC(N1CC2=CC=CO2)=C3C(N(CC4=CC=CC=C4)N(C5=CC=CC=N5)C3=O)=CC1=O</chem>           | TR                   |  |
|    |    |    | AVG-080 | 2.6 (1.7 - 6.4)       | >300                  | 115  | <chem>CC(N1CC2=CC=CO2)=C3C(N(CC4=CC=CC=C4)N(C5=CC=CC=C5)C3=O)=CC1=O</chem>           | TE                   |  |
|    |    |    | AVG-081 | 20                    | 90.0                  | 4.5  | <chem>CC(N1CC2=CC=CO2)=C3C(N(CC4=CC=CC=C4)N(C5=CC=CN=C5)C3=O)=CC1=O</chem>           | N/A                  |  |
|   |   |   | AVG-082 | 4.7 (3.2 - 10.8)      | 190.0                 | 40   | <chem>CC(N1CC2=CC=CO2)=C3C(N(CC4=CC=CC=C4)N(C5=CC=NC=C5)C3=O)=CC1=O</chem>           | N/A                  |  |
|  |  |  | AVG-105 | >20                   | >300                  | N/A  | <chem>CC(N1CC2=CC=CO2)=C3C(N(CC4=CC=CC=C4)N(C5=NC=CC=N5)C3=O)=CC1=O</chem>           | N/A                  |  |
|  |  |  | AVG-106 | 1.6 (1.1 - 2.6)       | 300.0                 | 188  | <chem>CC(N1CC2=CC=CO2)=C3C(N(CC4=CC=CC=C4)N(C5=CN=CC=N5)C3=O)=CC1=O</chem>           | TE                   |  |
|  |  |  | AVG-108 | 6.9                   | >300                  | >45  | <chem>CC(N1CC2=CC=CO2)=C3C(N(CC4=CC=CC=C4)N(C5=CC=NC=N5)C3=O)=CC1=O</chem>           | TE                   |  |
|  |  |  | AVG-109 | 3.5                   | >300                  | >86  | <chem>CC(N1CC2=CC=CO2)=C3C(N(CC4=CC=CC=C4)N(C5=CC=CN=N5)C3=O)=CC1=O</chem>           | N/A                  |  |

<sup>1</sup>TE: 3D-QSAR test set; TR: 3D-QSAR training set; N/A: not applicable

**Table S2.** Chemical elaboration of scaffolds section 2.

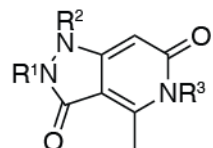

| R <sup>1</sup> | R <sup>2</sup> | R <sup>3</sup> | Name    | EC <sub>50</sub> [μM] | CC <sub>50</sub> [μM] | SI   | SMILES                                                                         | 3D-QSAR <sup>1</sup> |
|----------------|----------------|----------------|---------|-----------------------|-----------------------|------|--------------------------------------------------------------------------------|----------------------|
|                | H              |                | AVG-022 | 0.59 (0.32-1.5)       | 6.7 (5.4-8.3)         | 11   | <chem>O=C1N(C2SC3C(N2)CCCC3)NC=2C1=C(C)N(CC1OCC1)C(=O)C=2</chem>               | N/A                  |
|                |                |                | AVG-023 | >20                   | >300                  | N/A  | <chem>O=C1N(N(C)C=2C1=C(C)N(CC1OCCC1)C(=O)C=2)C1SC2C(N1)CCCC2</chem>           | N/A                  |
|                |                |                | AVG-024 | 1.21 (0.92 - 1.63)    | 138.0                 | 114  | <chem>O=C1N(N(CC2CCCCC2)C=2C1=C(C)N(CC1OCCC1)C(=O)C=2)C1SC2C(N1)CCCC2</chem>   | TE                   |
|                |                |                | AVG-025 | 1.99 (1.37-3.37)      | >200                  | >101 | <chem>O=C1N(N(CC2CCOCC2)C=2C1=C(C)N(CC1OCCC1)C(=O)C=2)C1SC2C(N1)CCCC2</chem>   | TE                   |
|                |                |                | AVG-026 | ~7.5                  | 13.7                  | 2    | <chem>O=C1N(N(CC2CCNCC2)C=2C1=C(C)N(CC1OCCC1)C(=O)C=2)C1SC2C(N1)CCCC2</chem>   | N/A                  |
|                |                |                | AVG-027 | ~20                   | 153.0                 | 8    | <chem>O=C1N(N(CC2CCN(C)CC2)C=2C1=C(C)N(CC1OCC1)C(=O)C=2)C1SC2C(N1)CCCC2</chem> | N/A                  |
|                |                |                | AVG-070 | 3.6                   | 88.0                  | 24   | <chem>O=C1N(N(CC(C)C)C=2C1=C(C)N(CC1OCCC1)C(=O)C=2)C1SC2C(N1)CCCC2</chem>      | N/A                  |
|                |                |                | AVG-071 | 1.4 (1.1 - 1.8)       | 60.0                  | 58   | <chem>O=C1N(N(CC2CCCC2)C=2C1=C(C)N(CC1OCCC1)C(=O)C=2)C1SC2C(N1)CCCC2</chem>    | N/A                  |
|                |                |                | AVG-072 | 1.03 (0.77 - 1.4)     | >300                  | 214  | <chem>O=C1N(N(CC2COCCC2)C=2C1=C(C)N(CC1OCCC1)C(=O)C=2)C1SC2C(N1)CCCC2</chem>   | TE                   |
|                |                |                | AVG-073 | 6.2                   | 96.0                  | 48   | <chem>O=C1N(N(CC2OCCCC2)C=2C1=C(C)N(CC1OCCC1)C(=O)C=2)C1SC2C(N1)CCCC2</chem>   | N/A                  |

|  |         |                   |      |      |                                                                              |     |
|--|---------|-------------------|------|------|------------------------------------------------------------------------------|-----|
|  | AVG-119 | 4.2 (2.14 - 35.3) | >300 | >71  | <chem>O=C1N(N(CC2NCCCC2)C=2C1=C(C)N(CC1OCCC1)C(=O)C=2)C1SC2C(N1)CCCC2</chem> | N/A |
|  | AVG-120 | 4.0 (2.14 - 35.3) | 86.0 | 21.5 | <chem>O=C1N(N(CC2CNCCC2)C=2C1=C(C)N(CC1OCCC1)C(=O)C=2)C1SC2C(N1)CCCC2</chem> | N/A |
|  | AVG-121 | 7                 | ~300 | 43   | <chem>O=C1N(N(CC2CCNCC2)C=2C1=C(C)N(CC1OCCC1)C(=O)C=2)C1SC2C(N1)CCCC2</chem> | N/A |
|  | AVG-122 | 2.5 (1.5 - 8.97)  | >300 | >120 | <chem>O=C1N(N(CC2OCCC2)C=2C1=C(C)N(CC1OCCC1)C(=O)C=2)C1SC2C(N1)CCCC2</chem>  | TE  |
|  | AVG-123 | ~20               | >300 | >15  | <chem>O=C1N(N(CC2COCC2)C=2C1=C(C)N(CC1OCCC1)C(=O)C=2)C1SC2C(N1)CCCC2</chem>  | N/A |
|  | AVG-124 | 7                 | >300 | 43   | <chem>O=C1N(N(CC2OCCN2)C=2C1=C(C)N(CC1OCCC1)C(=O)C=2)C1SC2C(N1)CCCC2</chem>  | N/A |
|  | AVG-125 | >20               | >300 | N/A  | <chem>O=C1N(N(CC2NCOC2)C=2C1=C(C)N(CC1OCCC1)C(=O)C=2)C1SC2C(N1)CCCC2</chem>  | N/A |
|  | AVG-126 | 6.04              | >300 | >47  | <chem>O=C1N(N(CC2OCNC2)C=2C1=C(C)N(CC1OCCC1)C(=O)C=2)C1SC2C(N1)CCCC2</chem>  | TE  |

<sup>1</sup>TE: 3D-QSAR test set; TR: 3D-QSAR training set; N/A: not applicable

**Table S3.** Chemical elaboration of scaffolds section 3.

|  |  |  | Name    | EC <sub>50</sub> [μM] | CC <sub>50</sub> [μM] | SI  | SMILES                                                                                   | 3D-QSAR <sup>1</sup> |
|--|--|--|---------|-----------------------|-----------------------|-----|------------------------------------------------------------------------------------------|----------------------|
|  |  |  | AVG-028 | 3.97                  | 58.0                  | 15  | <chem>CC(N1CCN2CCOCC2)=C3C(N(CC4=CC=CC=C4)N(C5=NC6=C(C=CC=C6)S5)C3=O)=CC1=O</chem>       | N/A                  |
|  |  |  | AVG-031 | 0.98 (0.51-4.3)*      | 288.0                 | 294 | <chem>CC(N1CC2=CC=C(Cl)C=C2)=C3C(N(CC4=CC=CC=C4)N(C5=NC6=C(C=CC=C6)S5)C3=O)=CC1=O</chem> | TE                   |
|  |  |  | AVG-036 | 0.89 (0.69 - 1.17)    | ~300                  | 337 | <chem>CC(N1CC2=CC=CC=N2)=C3C(N(CC4=CC=CC=C4)N(C5=NC6=C(C=CC=C6)S5)C3=O)=CC1=O</chem>     | TE                   |
|  |  |  | AVG-038 | >20                   | 31.0                  | N/A | <chem>CC(N1CC2CCNCC2)=C3C(N(CC4=CC=CC=C4)N(C5=NC6=C(C=CC=C6)S5)C3=O)=CC1=O</chem>        | N/A                  |
|  |  |  | AVG-039 | ~20                   | 14.2                  | 1   | <chem>CC(N1CC2CCN(C)CC2)=C3C(N(CC4=CC=CC=C4)N(C5=NC6=C(C=CC=C6)S5)C3=O)=CC1=O</chem>     | N/A                  |
|  |  |  | AVG-040 | 6.06                  | 145.0                 | 24  | <chem>CC(N1CC2CCOCC2)=C3C(N(CC4=CC=CC=C4)N(C5=NC6=C(C=CC=C6)S5)C3=O)=CC1=O</chem>        | N/A                  |
|  |  |  | AVG-074 | ~20                   | >300                  | 15  | <chem>CC(N1CC2OCCC2)=C3C(N(CC4=CC=CC=C4)N(C5=NC6=C(C=CC=C6)S5)C3=O)=CC1=O</chem>         | N/A                  |
|  |  |  | AVG-075 | 2.6 (2.1 - 3.4)       | 65.0                  | 25  | <chem>CC(N1CC2COCC2)=C3C(N(CC4=CC=CC=C4)N(C5=NC6=C(C=CC=C6)S5)C3=O)=CC1=O</chem>         | N/A                  |
|  |  |  | AVG-076 | ~20                   | >300                  | 15  | <chem>CC(N1CC2=CC=CC=C2Cl)=C3C(N(CC4=CC=CC=C4)N(C5=NC6=C(C=CC=C6)S5)C3=O)=CC1=O</chem>   | N/A                  |



|                                                                                     |                                                                                     |                                                                                     |         |                    |       |       |                                                                                                    |     |
|-------------------------------------------------------------------------------------|-------------------------------------------------------------------------------------|-------------------------------------------------------------------------------------|---------|--------------------|-------|-------|----------------------------------------------------------------------------------------------------|-----|
| 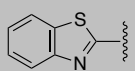   |    |    | AVG-077 | 0.82 (0.68 - 1.05) | 23.0  | 28    | <chem>CC(N1CC2=CC=CC(Cl)=C2)=C3C(N(CC4=C<br/>C=CC=C4)N(C5=NC6=C(C=CC=C6)S5)C3=O<br/>)=CC1=O</chem> | N/A |
|    |    |    | AVG-088 | 1.6 (1.2 - 2.1)    | 26.0  | 16    | <chem>CC(N1CC2=CC=CN=C2)=C3C(N(CC4=CC=C<br/>C=C4)N(C5=NC6=C(C=CC=C6)S5)C3=O)=C<br/>C1=O</chem>     | N/A |
|    |    |    | AVG-089 | 1.6 (1.1 - 2.3)    | 37.0  | 23    | <chem>CC(N1CC2=CC=NC=C2)=C3C(N(CC4=CC=C<br/>C=C4)N(C5=NC6=C(C=CC=C6)S5)C3=O)=C<br/>C1=O</chem>     | N/A |
|    |    |    | AVG-090 | ~20                | 33.0  | 1.7   | <chem>CC(N1CC2=NC=CC=N2)=C3C(N(CC4=CC=C<br/>C=C4)N(C5=NC6=C(C=CC=C6)S5)C3=O)=C<br/>C1=O</chem>     | N/A |
|    |    |    | AVG-091 | 4.6 (3.0 - 36.7)   | 266.0 | 58    | <chem>CC(N1CC2=CC=CN=N2)=C3C(N(CC4=CC=C<br/>C=C4)N(C5=NC6=C(C=CC=C6)S5)C3=O)=C<br/>C1=O</chem>     | N/A |
|    |    |    | AVG-092 | 2.3 (1.5 - 4.2)    | 98.0  | 43    | <chem>CC(N1CC2=CC=NC=N2)=C3C(N(CC4=CC=C<br/>C=C4)N(C5=NC6=C(C=CC=C6)S5)C3=O)=C<br/>C1=O</chem>     | N/A |
|    |    |   | AVG-093 | 0.8 (0.6 - 1.1)    | 43.0  | 54    | <chem>CC(N1CC2=CN=CC=N2)=C3C(N(CC4=CC=C<br/>C=C4)N(C5=NC6=C(C=CC=C6)S5)C3=O)=C<br/>C1=O</chem>     | N/A |
|  |  |  | AVG-094 | 0.11 (0.08 - 1.52) | >300  | >2727 | <chem>CC(N1CC2=CC=CC(Cl)=N2)=C3C(N(CC4=C<br/>C=CC=C4)N(C5=NC6=C(C=CC=C6)S5)C3=O<br/>)=CC1=O</chem> | TR  |
|  |  |  | AVG-095 | 1.6 (1.14 - 2.18)  | 68.0  | 42.5  | <chem>CC(N1CC2=CC=C(Cl)C=N2)=C3C(N(CC4=C<br/>C=CC=C4)N(C5=NC6=C(C=CC=C6)S5)C3=O<br/>)=CC1=O</chem> | N/A |
|  |  |  | AVG-096 | 6.9                | 13.3  | 1.9   | <chem>CC(N1CC2=NC=CO2)=C3C(N(CC4=CC=CC=<br/>C4)N(C5=NC6=C(C=CC=C6)S5)C3=O)=CC1<br/>=O</chem>       | N/A |
|  |  |  | AVG-097 | 5.9                | 30.0  | 5.1   | <chem>CC(N1CC2=NC=CN2)=C3C(N(CC4=CC=CC=<br/>C4)N(C5=NC6=C(C=CC=C6)S5)C3=O)=CC1<br/>=O</chem>       | N/A |

|  |  |  |         |                     |      |       |                                                                                           |     |
|--|--|--|---------|---------------------|------|-------|-------------------------------------------------------------------------------------------|-----|
|  |  |  | AVG-098 | 5.7 (4.3 - 8.6)     | 40.0 | 7     | <chem>CC(N1CC2=NC=CN2C)=C3C(N(CC4=CC=C(C=C4)N(C5=NC6=C(C=CC=C6)S5)C3=O)=CC1=O</chem>      | N/A |
|  |  |  | AVG-099 | 3.9 (2.8 - 5.7)     | 33.0 | 9     | <chem>CC(N1CC2=CNC=N2)=C3C(N(CC4=CC=CC=C4)N(C5=NC6=C(C=CC=C6)S5)C3=O)=CC1=O</chem>        | N/A |
|  |  |  | AVG-100 | >20                 | >300 | N/A   | <chem>CC(N1CC2=CN(C)C=N2)=C3C(N(CC4=CC=CC=C4)N(C5=NC6=C(C=CC=C6)S5)C3=O)=CC1=O</chem>     | N/A |
|  |  |  | AVG-101 | 1.7                 | 102  | 60    | <chem>CC(N1CC2=CC=NN2)=C3C(N(CC4=CC=CC=C4)N(C5=NC6=C(C=CC=C6)S5)C3=O)=CC1=O</chem>        | N/A |
|  |  |  | AVG-102 | 7.8                 | 60.0 | 7.7   | <chem>CC(N1CC2=CC=NN2C)=C3C(N(CC4=CC=C(C=C4)N(C5=NC6=C(C=CC=C6)S5)C3=O)=CC1=O</chem>      | N/A |
|  |  |  | AVG-103 | 3.47                | >300 | >87   | <chem>CC(N1CC2=NN(C)C=C2)=C3C(N(CC4=CC=CC=C4)N(C5=NC6=C(C=CC=C6)S5)C3=O)=CC1=O</chem>     | TE  |
|  |  |  | AVG-157 | 0.16 (0.09 - 0.26)  | ~300 | 1875  | <chem>CC(N1CC2=CC=CC(C)=N2)=C3C(N(CC4=CC=CC=C4)N(C5=NC6=C(C=CC=C6)S5)C3=O)=CC1=O</chem>   | TE  |
|  |  |  | AVG-158 | 0.15 (0.001 - 0.34) | >300 | >2000 | <chem>CC(N1CC2=CC=CC(OC)=N2)=C3C(N(CC4=CC=CC=C4)N(C5=NC6=C(C=CC=C6)S5)C3=O)=CC1=O</chem>  | TR  |
|  |  |  | AVG-160 | 1.67 (0.99 - 3.15)  | >300 | >180  | <chem>CC(N1CC2=CC(Cl)=CC=N2)=C3C(N(CC4=C(C=CC=C4)N(C5=NC6=C(C=CC=C6)S5)C3=O)=CC1=O</chem> | TE  |
|  |  |  | AVG-161 | 6.1                 | >300 | >49   | <chem>CC(N1CC2=C(Cl)C=CC=N2)=C3C(N(CC4=C(C=CC=C4)N(C5=NC6=C(C=CC=C6)S5)C3=O)=CC1=O</chem> | N/A |
|  |  |  | AVG-162 | ~20                 | >300 | >15   | <chem>CC(N1CC2=CN=CC(Cl)=N2)=C3C(N(CC4=C(C=CC=C4)N(C5=NC6=C(C=CC=C6)S5)C3=O)=CC1=O</chem> | N/A |

|  |  |  |         |                    |      |       |                                                                                                           |     |
|--|--|--|---------|--------------------|------|-------|-----------------------------------------------------------------------------------------------------------|-----|
|  |  |  | AVG-163 | 1.9                | >300 | >158  | <chem>CC(N1CC2=CN=C(Cl)C=N2)=C3C(N(CC4=C<br/>C=CC=C4)N(C5=NC6=C(C=CC=C6)S5)C3=O<br/>)=CC1=O</chem>        | TE  |
|  |  |  | AVG-164 | >20                | >300 | NA    | <chem>CC(N1CC2=C(Cl)N=CC=N2)=C3C(N(CC4=C<br/>C=CC=C4)N(C5=NC6=C(C=CC=C6)S5)C3=O<br/>)=CC1=O</chem>        | N/A |
|  |  |  | AVG-168 | 0.21               | ~300 | 1429  | <chem>CC(N1CC2=CC=C(Cl)C(Cl)=N2)=C3C(N(CC4<br/>=CC=CC=C4)N(C5=NC6=C(C=CC=C6)S5)C3<br/>=O)=CC1=O</chem>    | TE  |
|  |  |  | AVG-169 | 0.72 (0.6 - 0.89)  | 124  | 172   | <chem>CC(N1CC2=CC(Cl)=CC(Cl)=N2)=C3C(N(CC4<br/>=CC=CC=C4)N(C5=NC6=C(C=CC=C6)S5)C3<br/>=O)=CC1=O</chem>    | TE  |
|  |  |  | AVG-170 | 2.75               | >300 | >109  | <chem>CC(N1C(C)C2=CC=CC(Cl)=N2)=C3C(N(CC4<br/>=CC=CC=C4)N(C5=NC6=C(C=CC=C6)S5)C3<br/>=O)=CC1=O</chem>     | N/A |
|  |  |  | AVG-201 | 0.21 (0.16 - 0.26) | >300 | >1429 | <chem>CC(N1CC2=CC=CC(C(F)(F)F)=N2)=C3C(N(C<br/>C4=CC=CC=C4)N(C5=NC6=C(C=CC=C6)S5)<br/>C3=O)=CC1=O</chem>  | N/A |
|  |  |  | AVG-202 | 0.12 (0.08 - 0.17) | 53   | 442   | <chem>CC(N1CC2=CC=CC(OC(F)(F)F)=N2)=C3C(N(<br/>CC4=CC=CC=C4)N(C5=NC6=C(C=CC=C6)S<br/>5)C3=O)=CC1=O</chem> | N/A |
|  |  |  | AVG-204 | 0.29 (0.25 - 0.35) | 94   | 324   | <chem>CC(N1CC2=CC=CC(OCC)=N2)=C3C(N(CC4<br/>=CC=CC=C4)N(C5=NC6=C(C=CC=C6)S5)C3<br/>=O)=CC1=O</chem>       | N/A |
|  |  |  | AVG-205 | 0.87 (0.54 - 1.36) | >300 | >345  | <chem>CC(N1CC2=CC=CC(OC(C)C)=N2)=C3C(N(C<br/>C4=CC=CC=C4)N(C5=NC6=C(C=CC=C6)S5)<br/>C3=O)=CC1=O</chem>    | N/A |
|  |  |  | AVG-206 | 4.54               | 6.5  | 1.4   | <chem>CC(N1CC2=CC=CC(OCCN(C)C)=N2)=C3C(<br/>N(CC4=CC=CC=C4)N(C5=NC6=C(C=CC=C6)<br/>S5)C3=O)=CC1=O</chem>  | N/A |

|  |  |  |         |                     |      |     |                                                                                                   |     |
|--|--|--|---------|---------------------|------|-----|---------------------------------------------------------------------------------------------------|-----|
|  |  |  | AVG-207 | 2.1 (1.7 - 2.58)    | 4.5  | 2.1 | <chem>CC(N1CC2=CC=CC(OCCCN(C)C)=N2)=C3C(N(CC4=CC=CC=C4)N(C5=NC6=C(C=CC=C6)S5)C3=O)=CC1=O</chem>   | N/A |
|  |  |  | AVG-208 | 1.57 (0.396 - 2.72) | 4.2  | 2.7 | <chem>CC(N1CC2=CC=CC(OC3CCN(C)CC3)=N2)=C4C(N(CC5=CC=CC=C5)N(C6=NC7=C(C=C=C7)S6)C4=O)=CC1=O</chem> | N/A |
|  |  |  | AVG-209 | ~10                 | 9.9  | 1.0 | <chem>CC(N1CC2=CC=CC(OC3CCNCC3)=N2)=C4C(N(CC5=CC=CC=C5)N(C6=NC7=C(C=CC=C7)S6)C4=O)=CC1=O</chem>   | N/A |
|  |  |  | AVG-210 | >10                 | 12   | N/A | <chem>CC(N1CC2CCCC(N2)=O)=C3C(N(CC4=CC=CC=C4)N(C5=NC6=C(C=CC=C6)S5)C3=O)=CC1=O</chem>             | N/A |
|  |  |  | AVG-212 | 14.4                | 79   | 5.5 | <chem>CC(N1CC2CCC(N2C)=O)=C3C(N(CC4=CC=CC=C4)N(C5=NC6=C(C=CC=C6)S5)C3=O)=CC1=O</chem>             | N/A |
|  |  |  | AVG-213 | 7.3                 | 43   | 5.9 | <chem>CC(N1CC2CCC(N2)=O)=C3C(N(CC4=CC=C=C4)N(C5=NC6=C(C=CC=C6)S5)C3=O)=CC1=O</chem>               | N/A |
|  |  |  | AVG-214 | 0.43 (0.3 - 0.6)    | ~300 | 698 | <chem>CC(N1CC2=CC=CC(F)=N2)=C3C(N(CC4=CC=CC=C4)N(C5=NC6=C(C=CC=C6)S5)C3=O)=CC1=O</chem>           | N/A |
|  |  |  | AVG-225 | 0.98 (0.72 - 1.36)  | 43   | 44  | <chem>CC(N1CC2=CC=CC(N3CCN(C)CC3)=N2)=C4C(N(CC5=CC=CC=C5)N(C6=NC7=C(C=CC=C7)S6)C4=O)=CC1=O</chem> | N/A |
|  |  |  | AVG-226 | 2.04 (1.8 - 2.24)   | 4.5  | 2.2 | <chem>CC(N1CC2=CC=CC(C3CCN(C)CC3)=N2)=C4C(N(CC5=CC=CC=C5)N(C6=NC7=C(C=CC=C7)S6)C4=O)=CC1=O</chem> | N/A |

|                                                                                                                                                                                                                                                       |         |                    |      |       |                                                                                                |     |
|-------------------------------------------------------------------------------------------------------------------------------------------------------------------------------------------------------------------------------------------------------|---------|--------------------|------|-------|------------------------------------------------------------------------------------------------|-----|
| 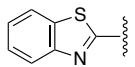   | AVG-227 | 0.26 (0.22 - 0.35) | 145  | 558   | <chem>CC(N1CC2=CC=CC(C3CCOCC3)=N2)=C4C(N(CC5=CC=CC=C5)N(C6=NC7=C(C=CC=C7)S6)C4=O)=CC1=O</chem> | N/A |
|    | AVG-228 | 0.28 (0.22 - 0.34) | >300 | >1071 | <chem>CC(N1CC2=CC=CC(N3CCOCC3)=N2)=C4C(N(CC5=CC=CC=C5)N(C6=NC7=C(C=CC=C7)S6)C4=O)=CC1=O</chem> | N/A |

<sup>1</sup>TE: 3D-QSAR test set; TR: 3D-QSAR training set; N/A: not applicable

**Table S4.** Combinatorial modification of different scaffolds sections.

| R <sup>1</sup> | R <sup>2</sup> | R <sup>3</sup> | Name    | EC <sub>50</sub> [μM] | CC <sub>50</sub> [μM] | SI    | SMILES                                                                           | 3D-QSAR <sup>1</sup> |
|----------------|----------------|----------------|---------|-----------------------|-----------------------|-------|----------------------------------------------------------------------------------|----------------------|
|                |                |                | AVG-078 | 0.61 (0.54 - 0.68)    | 67.0                  | 110   | <chem>CC(N1CC2=CC=C(Cl)C=C2)=C3C(N(CC4=CC=CC=C4)N(C5=CC=CC=N5)C3=O)=CC1=O</chem> | N/A                  |
|                |                |                | AVG-104 | 4.1                   | 27.0                  | 7     | <chem>CC(N1CC2=CC=CC=N2)=C3C(N(CC4=CC=CC=C4)N(C5=CC=CC=N5)C3=O)=CC1=O</chem>     | N/A                  |
|                |                |                | AVG-127 | 0.99                  | >300                  | >303  | <chem>CC(N1CC2=CC=CC=C2Cl)=C3C(N(CC4=CC=CC=C4)N(C5=CC=CC=N5)C3=O)=CC1=O</chem>   | TE                   |
|                |                |                | AVG-128 | 0.26 (0.17 - 0.42)    | >300                  | >1154 | <chem>CC(N1CC2=CC=CC(Cl)=C2)=C3C(N(CC4=CC=CC=C4)N(C5=CC=CC=N5)C3=O)=CC1=O</chem> | TE                   |
|                |                |                | AVG-129 | 0.79 (0.63 - 1.02)    | >300                  | >380  | <chem>CC(N1CC2=CC=C(F)C=C2)=C3C(N(CC4=CC=CC=C4)N(C5=CC=CC=N5)C3=O)=CC1=O</chem>  | TE                   |
|                |                |                | AVG-130 | 0.87 (0.58 - 1.36)    | >300                  | >345  | <chem>CC(N1CC2=CC=CC=C2F)=C3C(N(CC4=CC=CC=C4)N(C5=CC=CC=N5)C3=O)=CC1=O</chem>    | TE                   |
|                |                |                | AVG-131 | 0.18 (0.14 - 0.22)    | ~300                  | 1667  | <chem>CC(N1CC2=CC=CC(F)=C2)=C3C(N(CC4=CC=CC=C4)N(C5=CC=CC=N5)C3=O)=CC1=O</chem>  | TE                   |
|                |                |                | AVG-132 | 2.20                  | >300                  | >136  | <chem>CC(N1CC2=CC=C(OC)C=C2)=C3C(N(CC4=CC=CC=C4)N(C5=CC=CC=N5)C3=O)=CC1=O</chem> | TR                   |

|                                                                                     |                                                                                     |                                                                                     |         |                    |      |       |                                                                                               |    |
|-------------------------------------------------------------------------------------|-------------------------------------------------------------------------------------|-------------------------------------------------------------------------------------|---------|--------------------|------|-------|-----------------------------------------------------------------------------------------------|----|
|    |    |    | AVG-133 | 0.72 (0.55 - 0.97) | 100  | 139   | <chem>CC(N1CC2=CC=CC=C2OC)=C3C(N(CC4=CC=CC=C4)N(C5=CC=CC=N5)C3=O)=CC1=O</chem>                | TR |
|    |    |    | AVG-134 | 0.6                | >300 | >500  | <chem>CC(N1CC2=CC=CC(OC)=C2)=C3C(N(CC4=CC=C(C=C4)N(C5=CC=CC=N5)C3=O)=CC1=O</chem>             | TR |
|    |    |    | AVG-171 | 0.08 (0.06 - 0.11) | ~300 | 3750  | <chem>CC(N1CC2=CC=CC(Cl)=N2)=C3C(N(CC4=CC=CC=C4)N(C5=CC=CC=N5)C3=O)=CC1=O</chem>              | TE |
|    |    |    | AVG-172 | 0.12               | ~300 | 2500  | <chem>CC(N1CC2=CC=C(Cl)C(Cl)=N2)=C3C(N(CC4=CC=CC=C4)N(C5=CC=CC=N5)C3=O)=CC1=O</chem>          | TE |
|    |    |    | AVG-173 | 0.29 (0.23 - 0.4)  | >300 | >1035 | <chem>CC(N1CC2=CC=CC(Cl)=N2)=C3C(N(CC4=CC=C(Cl)C=C4)N(C5=NC6=C(C=CC=C6)S5)C3=O)=CC1=O</chem>  | TE |
|    |    |    | AVG-174 | 2.0                | >300 | >150  | <chem>CC(N1CC2=CC=CC(Cl)=N2)=C3C(N(CC4=CC=CC(Cl)C=C4)N(C5=NC6=C(C=CC=C6)S5)C3=O)=CC1=O</chem> | TE |
|   |   |   | AVG-175 | 1.4                | >300 | >214  | <chem>CC(N1CC2=CC=CC(Cl)=N2)=C3C(N(CC4=CC=CC=C4Cl)N(C5=NC6=C(C=CC=C6)S5)C3=O)=CC1=O</chem>    | TE |
|  |  |  | AVG-176 | 0.14 (0.12 - 0.17) | ~300 | 2143  | <chem>CC(N1CC2=CC=CC(Cl)=N2)=C3C(N(CC4=CC=CC=C4OC)N(C5=NC6=C(C=CC=C6)S5)C3=O)=CC1=O</chem>    | TR |
|  |  |  | AVG-177 | 0.78 (0.3 - 7.6)   | >300 | >385  | <chem>CC(N1CC2=CC=CC(Cl)=N2)=C3C(N(CC4=CC=CC(OC)=C4)N(C5=NC6=C(C=CC=C6)S5)C3=O)=CC1=O</chem>  | TR |
|  |  |  | AVG-178 | 0.08 (0.06 - 0.1)  | ~300 | 3750  | <chem>CC(N1CC2=CC=CC(Cl)=N2)=C3C(N(CC4=CC=C(OC)C=C4)N(C5=NC6=C(C=CC=C6)S5)C3=O)=CC1=O</chem>  | TR |

|                                                                                    |                                                                                    |                                                                                    |         |                       |      |       |                                                                                           |     |
|------------------------------------------------------------------------------------|------------------------------------------------------------------------------------|------------------------------------------------------------------------------------|---------|-----------------------|------|-------|-------------------------------------------------------------------------------------------|-----|
|   |   |   | AVG-203 | 0.047 (0.03 - 0.06)   | >300 | >6383 | <chem>CC(N1CC2=CC=CC(OC)=N2)=C3C(N(CC4=CC=C=C4)N(C5=CC=CC=N5)C3=O)=CC1=O</chem>           | TR  |
|   |   |   | AVG-229 | 0.31                  | ~300 | 968   | <chem>CC(N1CC2=CC=CC(C3=CC=CC=C3)=N2)=C4C(N(CC5=CC=CC=C5)N(C6=CC=CC=N6)C4=O)=CC1=O</chem> | N/A |
|   |   |   | AVG-230 | 0.54 (0.47 - 0.61)    | >300 | >556  | <chem>CC(N1CC2=CC=CC(OC(C)C)=N2)=C3C(N(CC4=C=C4)N(C5=CC=CC=N5)C3=O)=CC1=O</chem>          | N/A |
|   |   |   | AVG-240 | 1.23 (0.98 - 1.57)    | >300 | >244  | <chem>CC(N1CC2=CC=CC(Cl)=N2)=C3C(N(CC4=CC=CC=C4)N(C5=C(OC)C=CC=N5)C3=O)=CC1=O</chem>      | N/A |
|   |   |   | AVG-241 | 0.039 (0.032 - 0.047) | 121  | 3103  | <chem>CC(N1CC2=CC=CC(Cl)=N2)=C3C(N(CC4=CC=CC=C4)N(C5=CC(OC)=CC=N5)C3=O)=CC1=O</chem>      | TR  |
|   |   |   | AVG-242 | 0.15 (0.12 - 0.18)    | ~300 | 2000  | <chem>CC(N1CC2=CC=CC(Cl)=N2)=C3C(N(CC4=CC=CC=C4)N(C5=CC=C(OC)C=N5)C3=O)=CC1=O</chem>      | TR  |
|  |  |  | AVG-243 | 0.96 (0.77 - 1.19)    | ~300 | 313   | <chem>CC(N1CC2=CC=CC(Cl)=N2)=C3C(N(CC4=CC=CC=C4)N(C5=CC=CC(OC)=N5)C3=O)=CC1=O</chem>      | TR  |

<sup>1</sup>TE: 3D-QSAR test set; TR: 3D-QSAR training set; N/A: not applicable



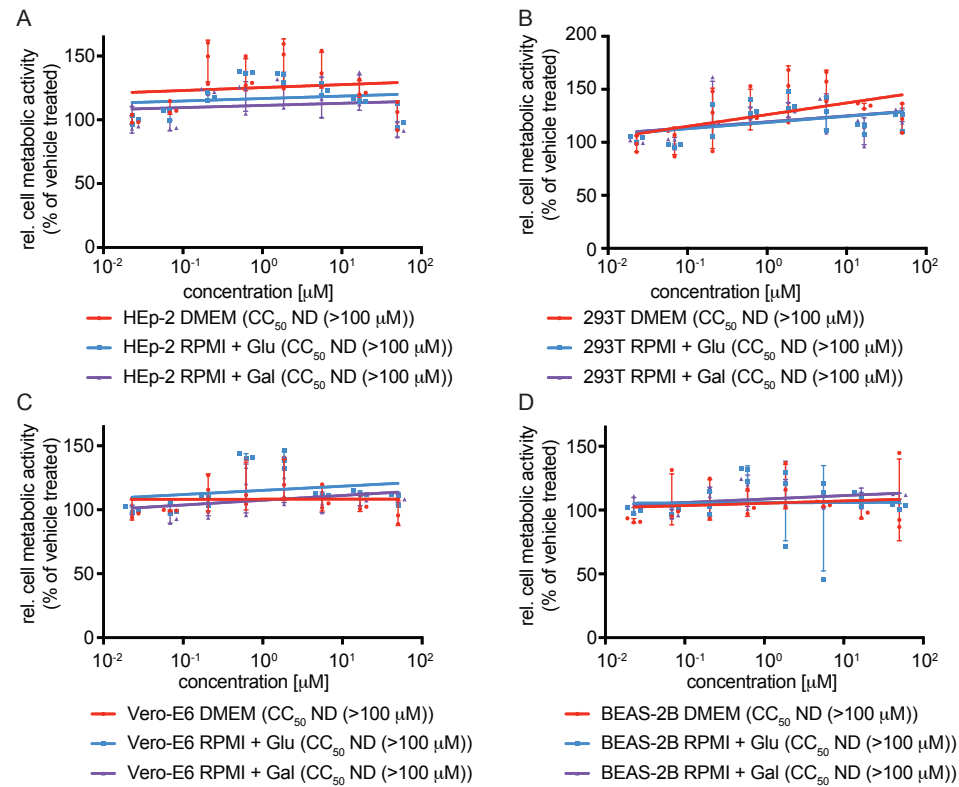

**Figure S1.** Cytotoxicity testing of established cell lines against AVG-233. Assays were performed after incubation of cells in high-glucose DMEM (red) or RPMI containing 11 mM glucose (blue), or 10 mM galactose, respectively. Cells were exposed to AVG-233 in the respective media for 48 hours. Under all conditions tested, AVG-233 lacked appreciable cytotoxicity on HEp-2 (A), 293T (B), Vero-E6 (C), and BEAS-2B (D) cell lines. Symbols in (A) to (D) represent individual biological repeats (N = 3 each), error bars show SD.
